# Supplementary material for: A micro/nano-multiscale hierarchical structure strategy to fabricate highly conducting films for electromagnetic interference shielding and energy storage
Source: Royal Society of Chemistry journal article supplement (doi:10.1039/d3ta00442b), 2023-01-01
Supplement: d3ta00442b1.pdf [file d3ta00442b1.pdf]

1 Electronic Supplementary Information (ESI)

2 **A micro/nano multiscale hierarchical structure strategy to fabricate**  
3 **highly conducting films for electromagnetic interference shielding and**  
4 **energy storage**

5 Beibei Wang<sup>1,4</sup>, Weiye Zhang<sup>1,4</sup>, Jingmeng Sun<sup>1,4</sup>, Chenhuan Lai<sup>2</sup>, Shengbo Ge<sup>2</sup>,  
6 Hongwu Guo<sup>1,4\*</sup>, Yi Liu<sup>1,4\*</sup>, Daihui Zhang<sup>2,3\*</sup>

7 <sup>1</sup>Key Laboratory of Wood Material Science and Application (Beijing Forestry  
8 University), Ministry of Education, Beijing 100083, China

9 <sup>2</sup>Co-Innovation Center of Efficient Processing and Utilization of Forest Resources,  
10 Nanjing Forestry University, Nanjing 210037, Jiangsu, China

11 <sup>3</sup>Institute of Chemical Industry of Forest Products, Chinese Academy of Forestry,  
12 Nanjing, Jiangsu 210042, China

13 <sup>4</sup>Engineering Research Center of Forestry Biomass Materials and Energy, Ministry of  
14 Education, Beijing Forestry University, Beijing 100083, China

15 \*Corresponding author. E-mail: guohongwu\_305@bjfu.edu.cn,  
16 liuyichina@bjfu.edu.cn, Daihui.zhang@mail.mcgill.ca

17

18 **Figures**

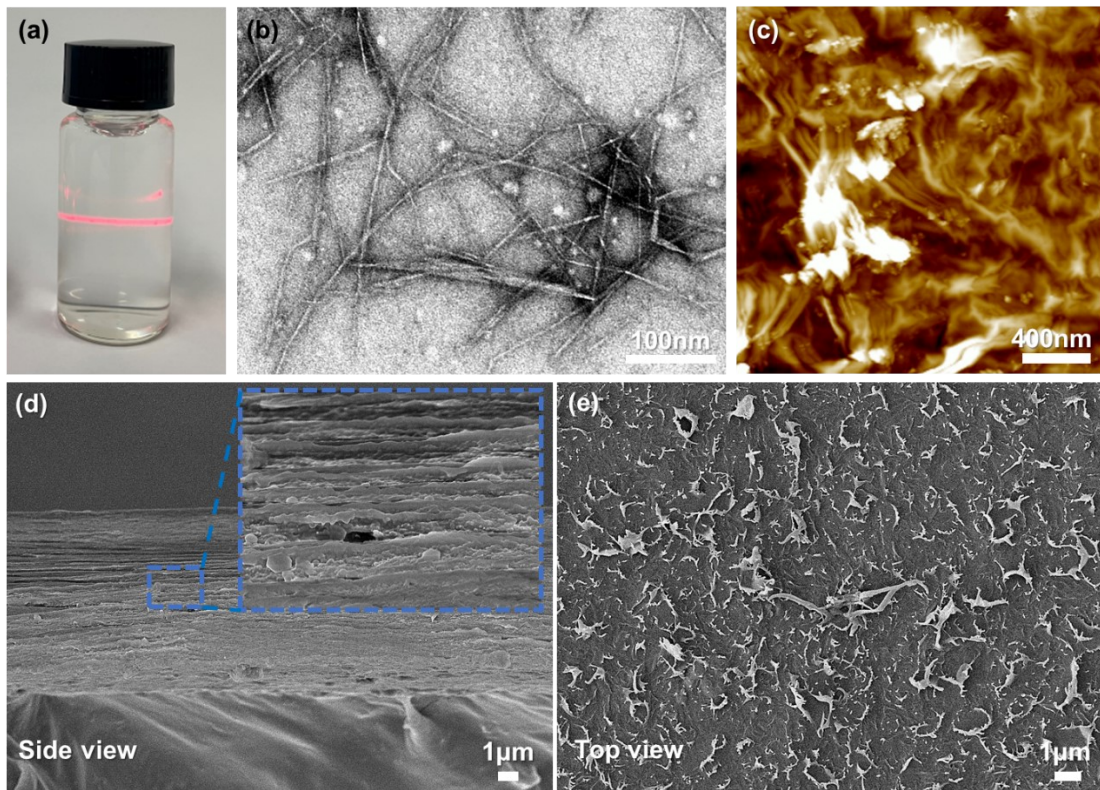

19

20 **Fig. S 1** **a** Digital photograph of the TOCNFs suspension. **b** TEM image of the TOCNFs  
 21 suspension. **c** AFM image of the TOCNFs suspension. **d-e** Side view and top view of  
 22 the pure TOCNFs film

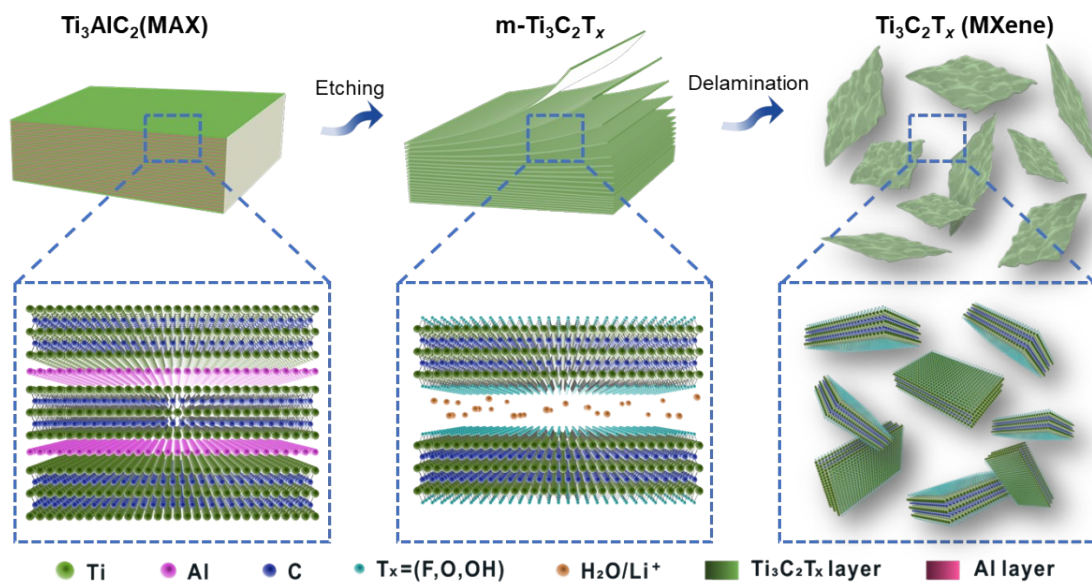

23

24

**Fig. S 2** Schematic illustration of the preparation of  $Ti_3C_2T_x$  nanosheets

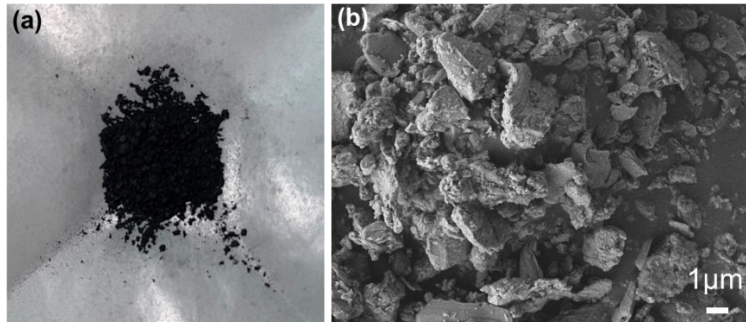

25

26

**Fig. S 3** **a** Digital photograph. **b** SEM image of the MAX powder

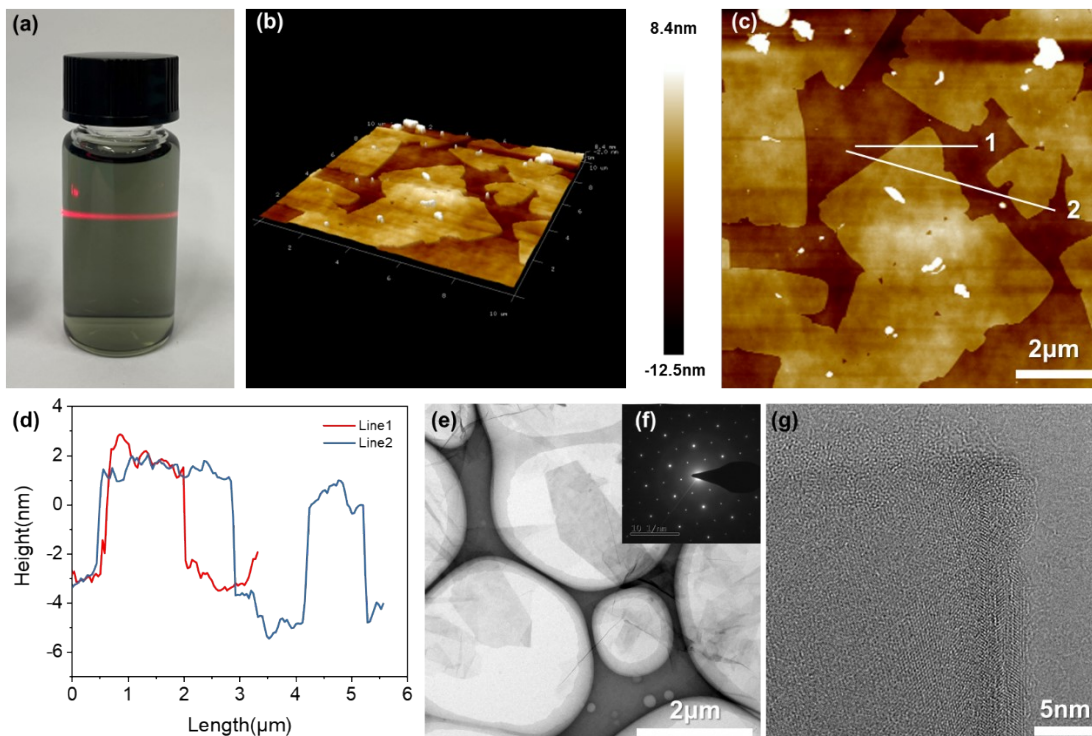

27

28 **Fig. S 4** **a** Digital photograph of the  $\text{Ti}_3\text{C}_2\text{T}_x$  suspension. **b** AFM image of the  $\text{Ti}_3\text{C}_2\text{T}_x$

29 suspension. **c** AFM image of the  $\text{Ti}_3\text{C}_2\text{T}_x$  nanosheets. **d** Height profiles of the different

30 lines marked on **c**. **e** HR-TEM image of the  $\text{Ti}_3\text{C}_2\text{T}_x$  suspension. **f** SAED patterns, and

31 **g** lattice fringes

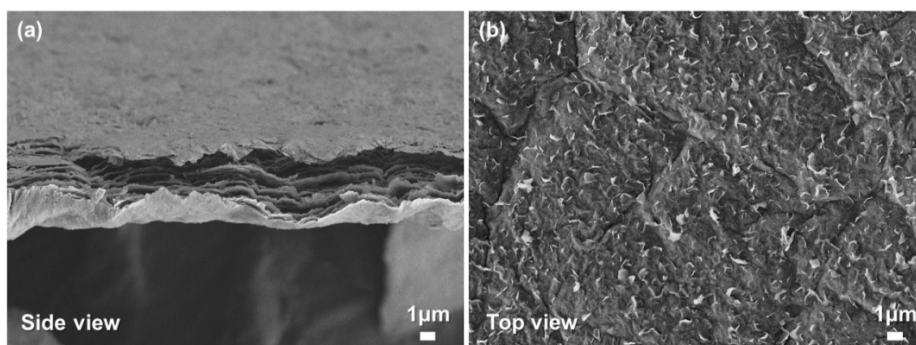

32

33

**Fig. S 5** **a** side view and **b** top view of the pure  $\text{Ti}_3\text{C}_2\text{T}_x$  film

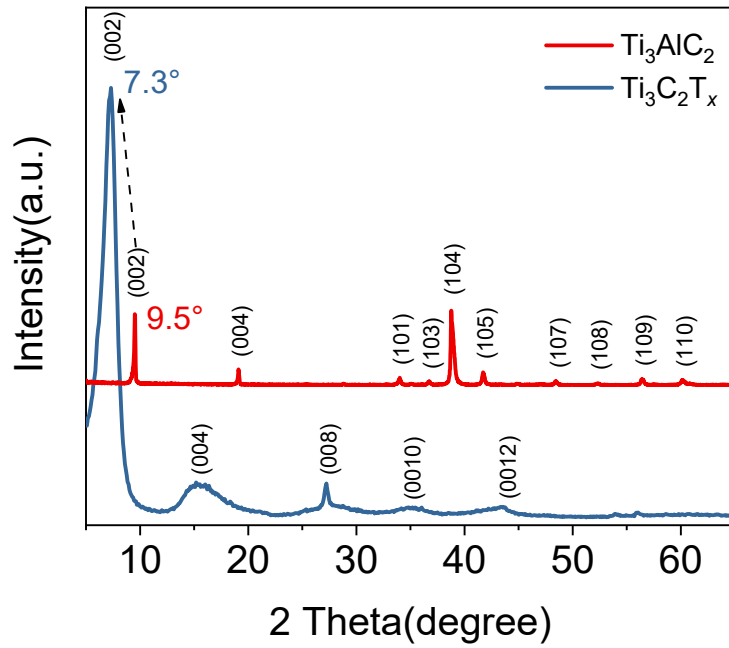

34

35

**Fig. S 6** XRD patterns of  $\text{Ti}_3\text{AlC}_2$  and  $\text{Ti}_3\text{C}_2\text{T}_x$

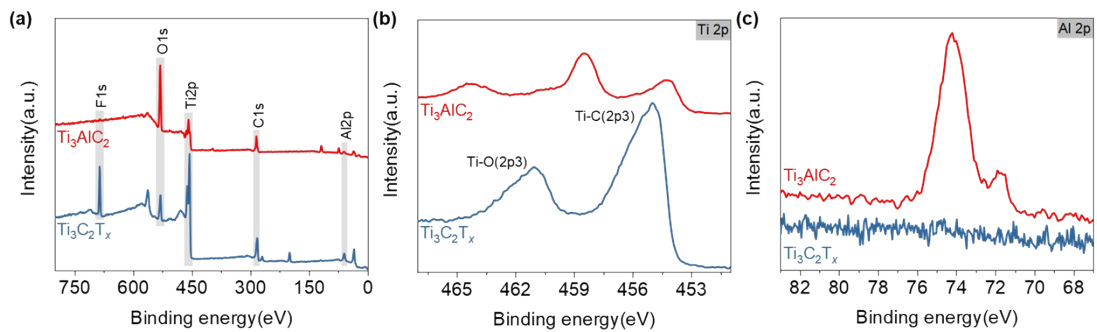

36

37 **Fig. S 7 a** XPS wide-scan spectra, **b** Ti 2p spectra, and **c** Al 2p spectra of the  $\text{Ti}_3\text{AlC}_2$

38 precursor and the  $\text{Ti}_3\text{C}_2\text{T}_x$  nanosheets

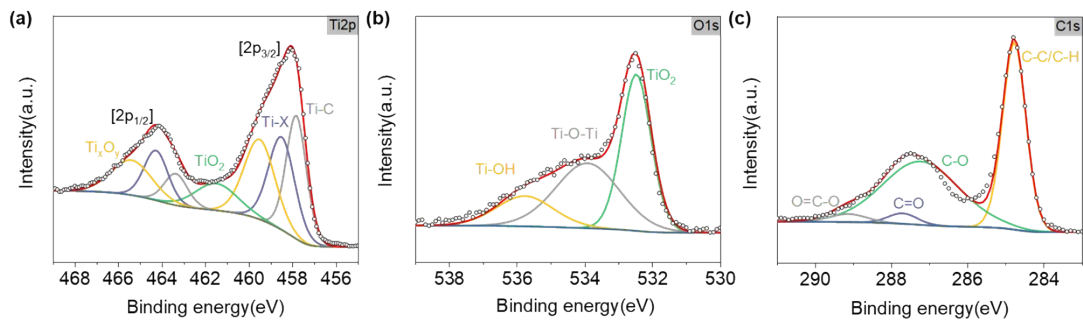

39

40

**Fig. S 8 a** Ti 2p, **b** O 1s, and **c** C 1s spectra of  $\text{Ti}_3\text{C}_2\text{T}_x$

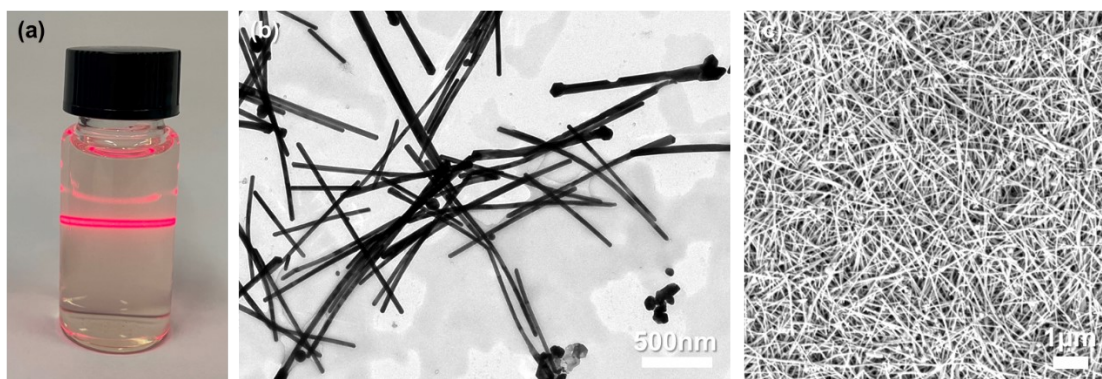

41  
 42 **Fig. S 9** **a** Digital photograph of the AgNW suspension. **b** TEM image of AgNW  
 43 suspension, and **c** SEM image of the pure AgNW film

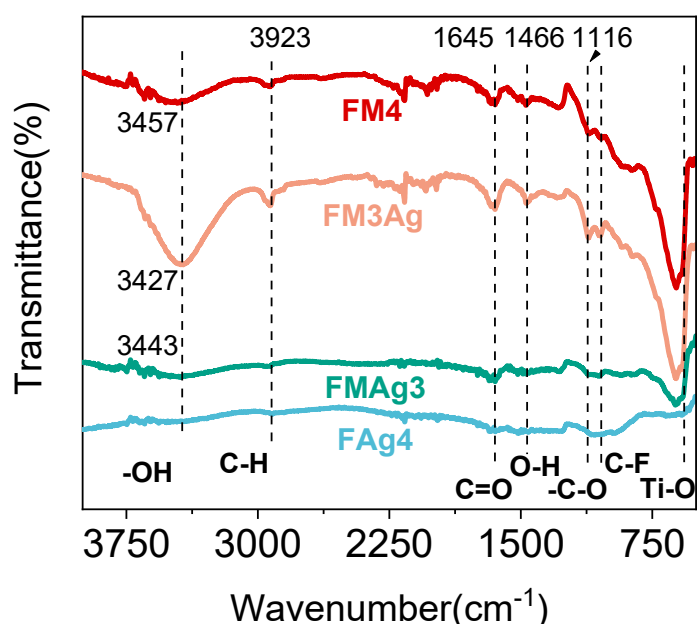

44  
 45 **Fig. S 10** FT-IR spectra of FM4, FM3Ag, FMAg3, and FAg4 hybrid films  
 46 The FM4 had a vibrational mode at 3482 cm<sup>-1</sup> assigned for -OH group out-of-  
 47 plane vibration, 1038 cm<sup>-1</sup> for C-F bonds, and 573 cm<sup>-1</sup> for Ti-O bonds. For FAg4,  
 48 obvious absorption peaks are observed at 1079 cm<sup>-1</sup>, and 1746 cm<sup>-1</sup> for -C-O bonds  
 49 and almost had indistinct -OH vibrational peaks.

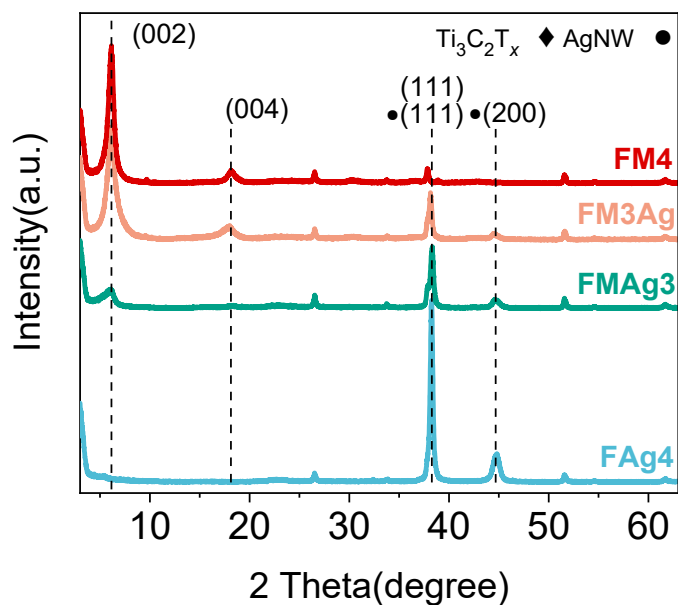

50

51

**Fig. S 11** XRD patterns of FM4, FM3Ag, FMAg3, and FAg4 hybrid films

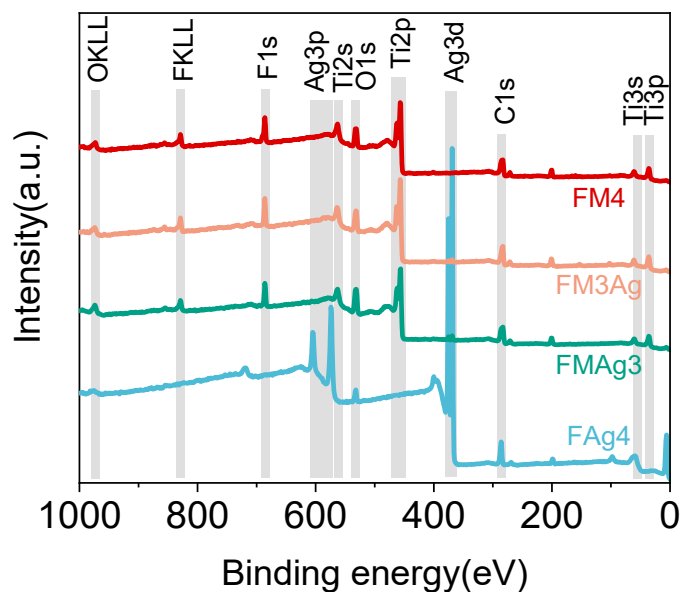

52

53

**Fig. S 12** XPS survey scan spectra of FM4, FM3Ag, FMAg3, and FAg4 hybrid films

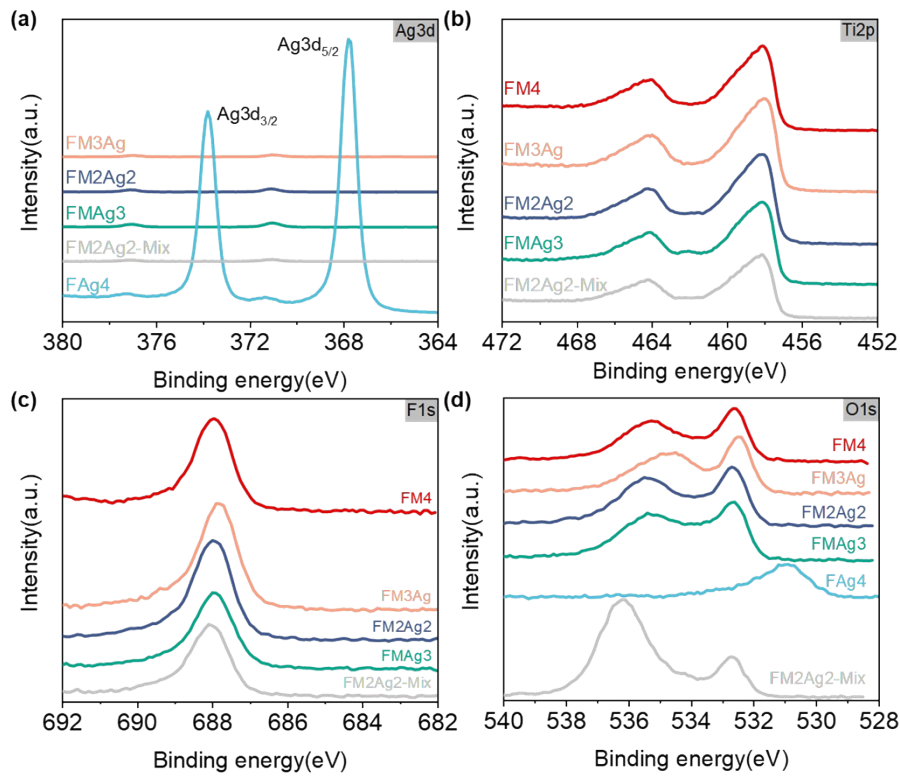

54

55 **Fig. S 13** High-resolution XPS from **a** Ag 3d region, **b** Ti 2p region, **c** F 1s region and

56

**d** O 1s region of the TOCNFs/Ti<sub>3</sub>C<sub>2</sub>T<sub>x</sub>/AgNW hybrid films

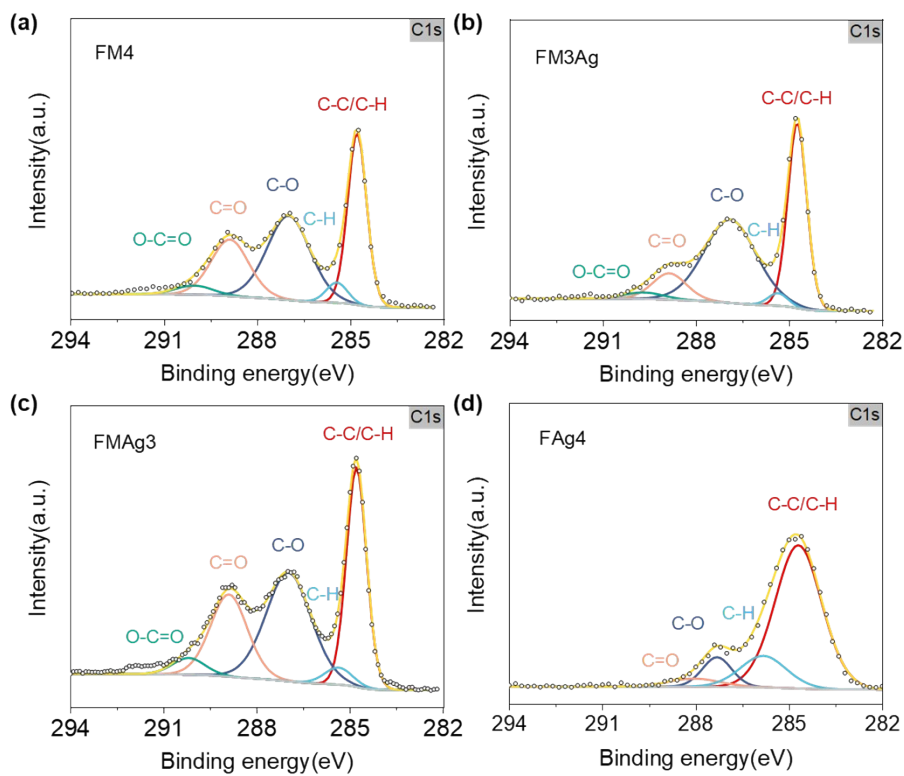

57

58 **Fig. S 14** C 1s spectra of **a** FM4, **b** FM3Ag, **c** FMAg3, and **d** FAg4

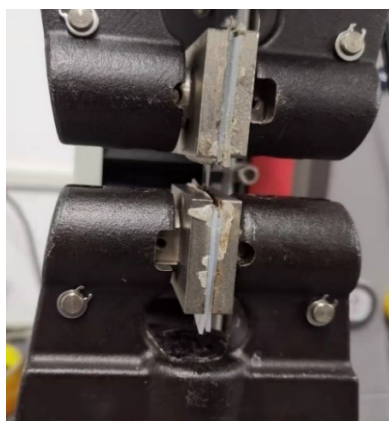

59

60

**Fig. S 15** Digital photo of micromechanical test

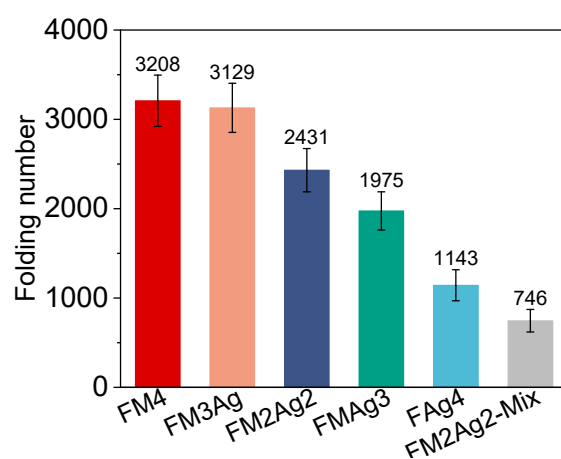

61

**Fig. S 16** Folding times of the TOCNFs/Ti<sub>3</sub>C<sub>2</sub>T<sub>x</sub>/AgNW hybrid films under loading of

63 4.9 N

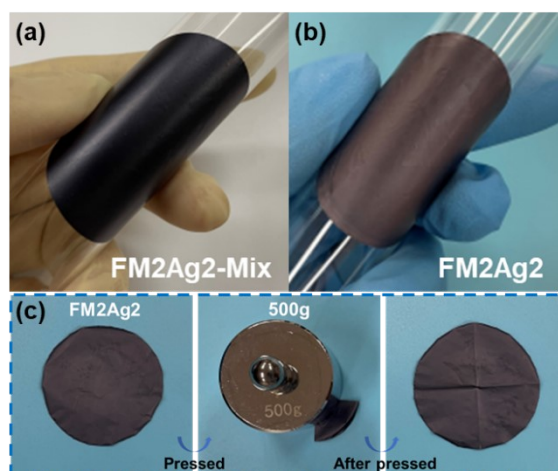

64

**Fig. S 17** Digital photos of **a** FM2Ag2-Mix hybrid film, **b** FM2Ag2 hybrid film, and **c**

66 FM2Ag2 hybrid film loaded with a weight of 500 grams without breaking or cracking



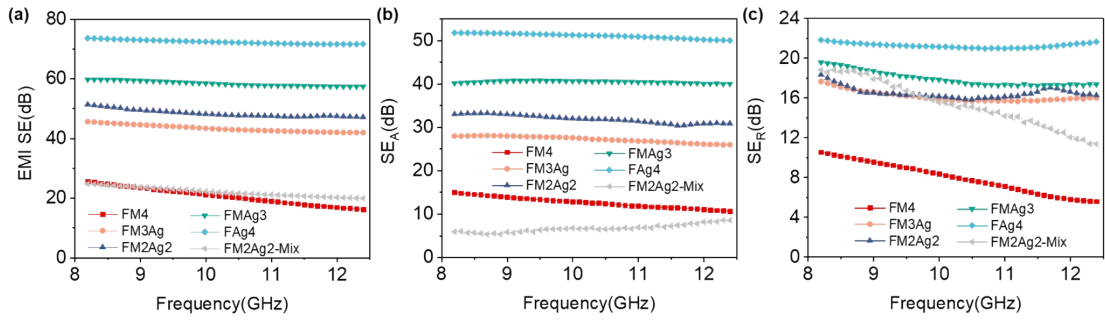

67

68 **Fig. S 18 a** EMI SE of the TOCNFs/Ti<sub>3</sub>C<sub>2</sub>T<sub>x</sub>/AgNW hybrid films in the X-band region.

69 **b** SE<sub>A</sub>, and **c** SE<sub>R</sub>

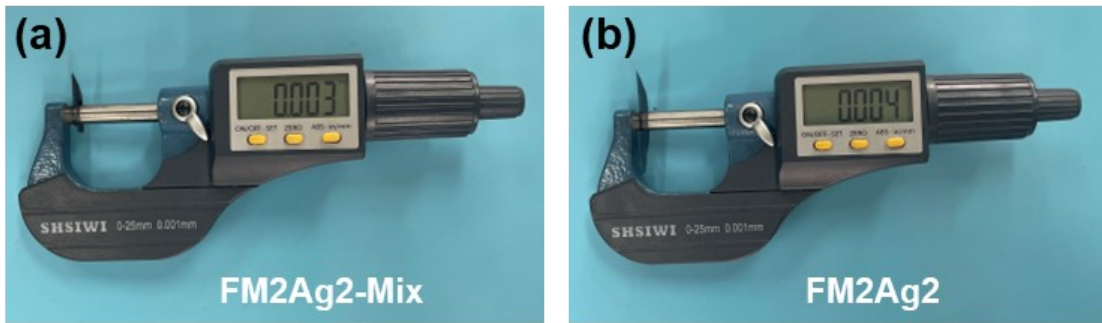

70

71

**Fig. S 19** The thickness of the FM2Ag2-Mix and FM2Ag2 hybrid films

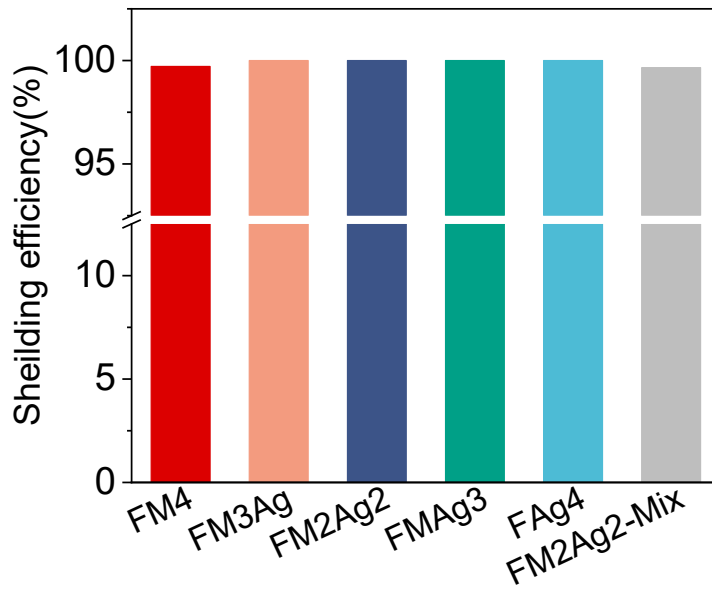

72

73

**Fig. S 20** Shielding efficiencies of the TOCNFs/Ti<sub>3</sub>C<sub>2</sub>T<sub>x</sub>/AgNW hybrid films

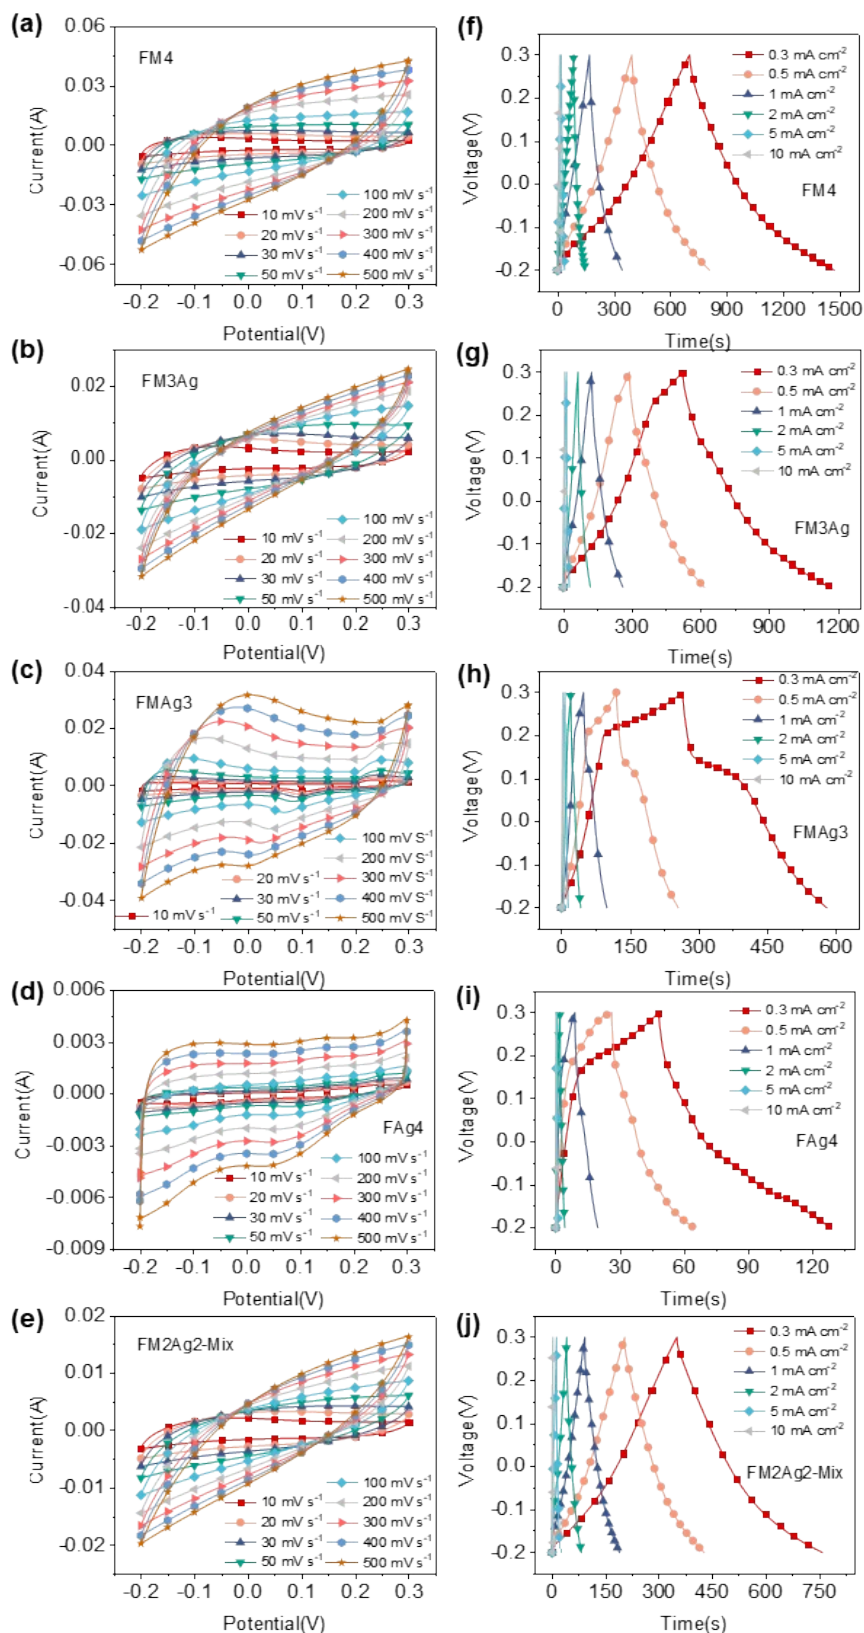

74

75 **Fig. S 21** CV curves and GCD curves of the TOCNFs/Ti<sub>3</sub>C<sub>2</sub>T<sub>x</sub>/AgNW electrodes: **a,f**

76 FM4, **b,g** FM3Ag, **c,h** FMAg3, **d,i** FAg4, and **e,j** FM2Ag2-Mix at different current

77 densities

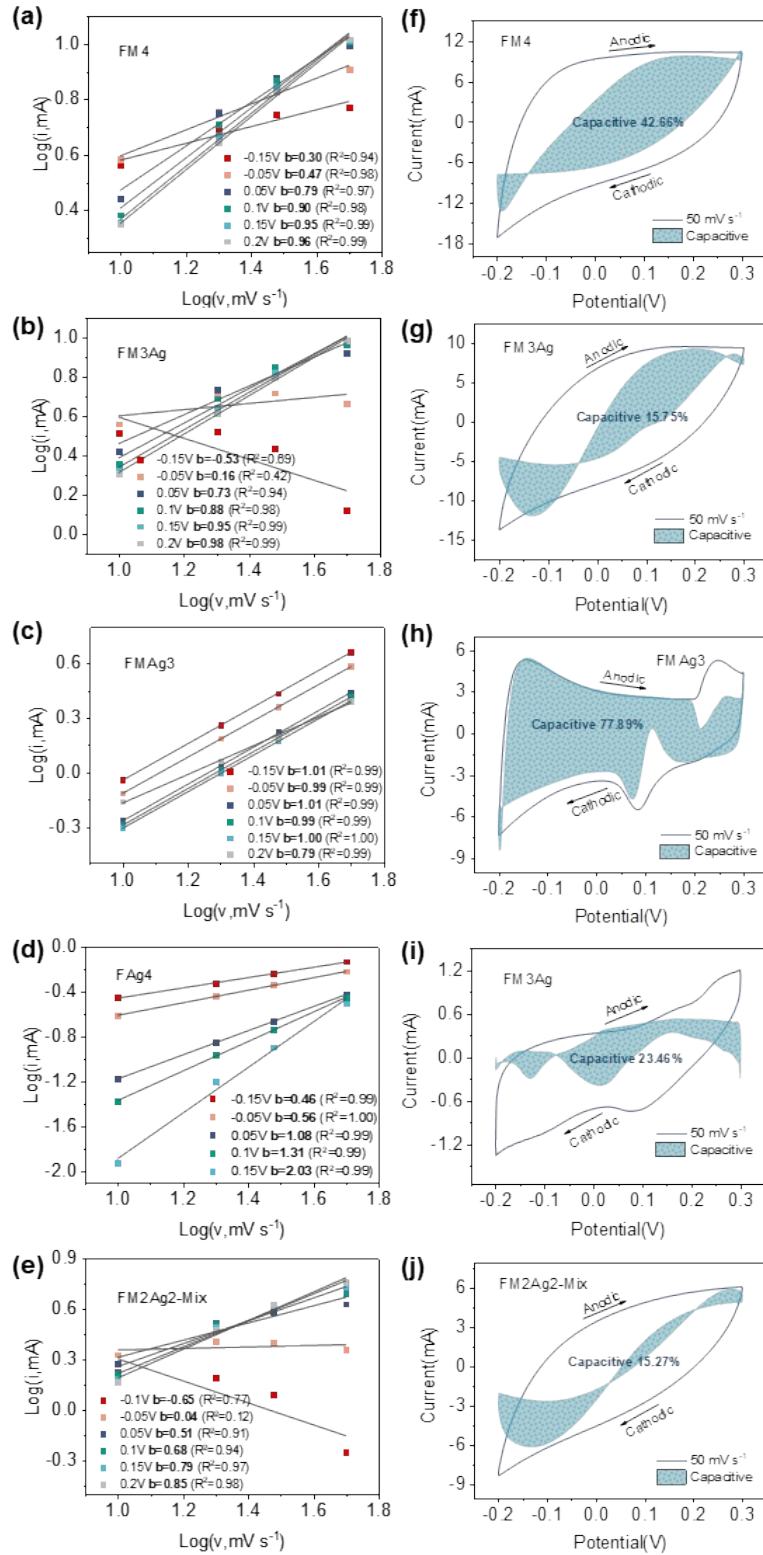

78

79 **Fig. S 22** The liner relationship of the current ( $i$ ) and the scan rate ( $v$ ), and surface  
 80 capacitance contribution of the TOCNFs/  $\text{Ti}_3\text{C}_2\text{T}_x$ /AgNW electrodes to the total charge  
 81 storage at  $50 \text{ mV s}^{-1}$ : **a,f** FM4, **b,g** FM3Ag, **c,h** FMAg3, **d,i** FAg4, and **e,j** FM2Ag2-  
 82 Mix

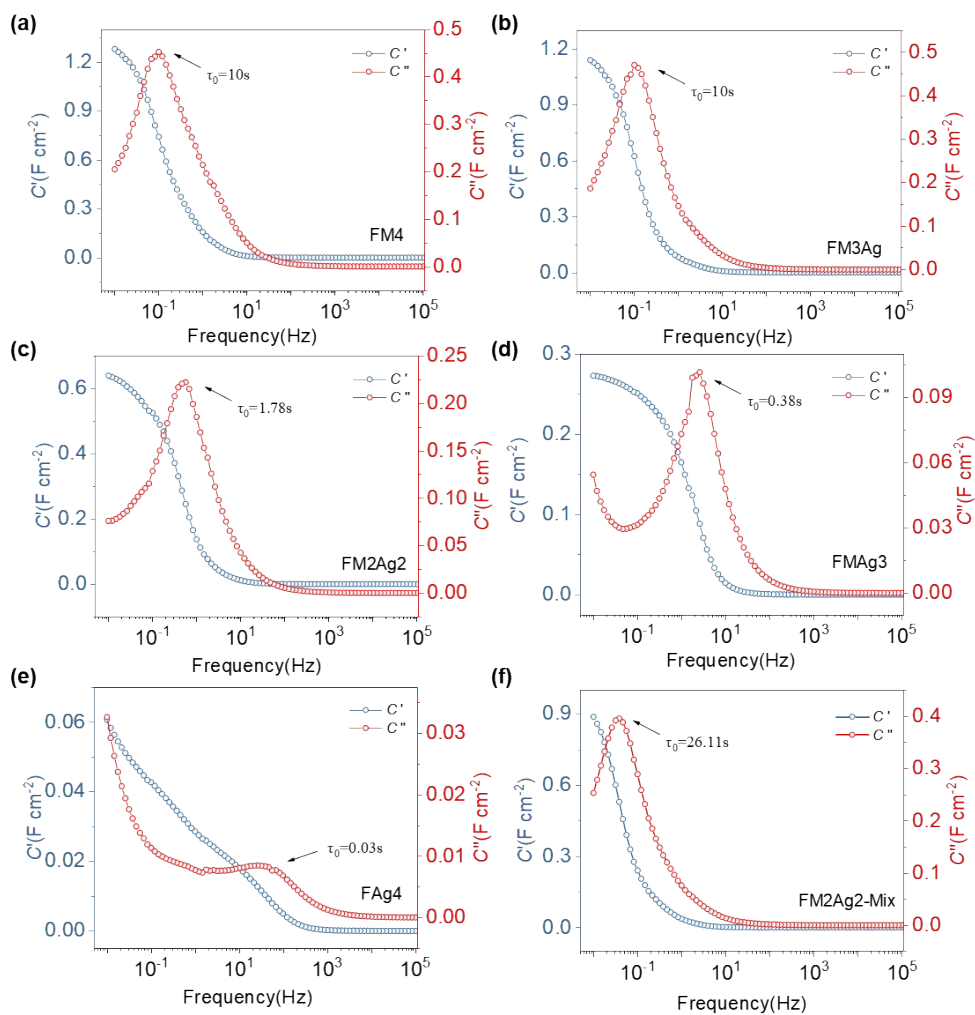

83

84 **Fig. S 23** Normalized real ( $C'$ ) and imaginary ( $C''$ ) parts of capacitance vs. frequency  
 85 of the electrodes: **a** FM4, **b** FM3Ag, **c** FM2Ag2, **d** FMAg3, **e** FAg4, and **f** FM2Ag2-  
 86 Mix

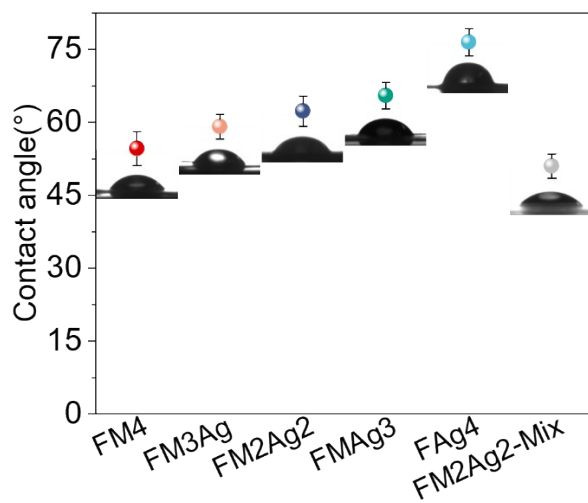

87

88 **Fig. S 24** Contact angle of TOCNFs/ $\text{Ti}_3\text{C}_2\text{T}_x$ /AgNW hybrid films

89 **Tables**

90 **Table S1** The mechanical properties of the TOCNFs/Ti<sub>3</sub>C<sub>2</sub>T<sub>x</sub>/AgNW hybrid films with  
 91 different Ti<sub>3</sub>C<sub>2</sub>T<sub>x</sub>/AgNW contents

| Sample     | Tensile strength<br>(MPa) | Fracture<br>strain (%) | Toughness<br>(MJ/m <sup>3</sup> ) | Young's<br>modulus<br>(GPa) |
|------------|---------------------------|------------------------|-----------------------------------|-----------------------------|
| FM4        | 116.10 ± 8.19             | 2.85 ± 0.26            | 1.09 ± 0.08                       | 9.02 ± 0.69                 |
| FM3Ag      | 107.41 ± 8.27             | 1.42 ± 0.20            | 0.68 ± 0.05                       | 11.20 ± 0.85                |
| FM2Ag2     | 85.63 ± 7.24              | 2.48 ± 0.24            | 1.02 ± 0.10                       | 5.18 ± 0.29                 |
| FMAg3      | 76.89 ± 7.14              | 2.26 ± 0.27            | 0.94 ± 0.07                       | 5.03 ± 0.31                 |
| FAG4       | 49.48 ± 5.67              | 1.74 ± 0.18            | 0.33 ± 0.07                       | 4.55 ± 0.67                 |
| FM2Ag2-Mix | 40.95 ± 5.29              | 1.57 ± 0.15            | 0.41 ± 0.08                       | 3.98 ± 0.53                 |

92

93

94 **Table S2** Comparison of the EMI shielding performance of the  
 95 TOCNFs/Ti<sub>3</sub>C<sub>2</sub>T<sub>x</sub>/AgNW hybrid films and other materials

| Sample | Materials                                             | Thickness<br>( $\mu\text{m}$ ) | Conductivity<br>( $\text{S m}^{-1}$ ) | EMI SE<br>(dB) | SSE/t (dB<br>$\text{cm}^2 \text{g}^{-1}$ ) | References       |
|--------|-------------------------------------------------------|--------------------------------|---------------------------------------|----------------|--------------------------------------------|------------------|
| 1      | CNF/CNT/Ti <sub>3</sub> C <sub>2</sub> T <sub>x</sub> | 12                             | 365000                                | 20.5           | 9316.4                                     | 1                |
| 2      | Ag@CMS                                                | 1000                           | $5.47 \times 10^{-5}$                 | 107.5          | 853.3                                      | 2                |
| 3      | Ag nanowires                                          | 5000                           | $5.4 \times 10^{-8}$                  | 35             | 2416                                       | 3                |
| 4      | CNTs/Ti <sub>3</sub> C <sub>2</sub><br>MXene/CNFs     | 38                             | 2506.6                                | 38.4           | 8020                                       | 4                |
| 5      | d-Ti <sub>3</sub> C <sub>2</sub> T <sub>x</sub> /CNFs | 167                            | 9.691                                 | 25             | 1326                                       | 5                |
| 6      | BMF/AgNW/M<br>Xene                                    | 2000                           | 24.5                                  | 52.6           | 5313                                       | 6                |
| 7      | MXene/AgNW/<br>PU                                     | 1320                           | 0.025                                 | 59             | 23674                                      | 7                |
| 8      | PVDF/MXene/<br>AgNW                                   | 300                            | 1.08                                  | 25.87          | 1091                                       | 8                |
| 9      | CNF@MXene<br>@AgNW                                    | 85                             | 37378.2                               | 55.9           | 10647.6                                    | 9                |
| 10     | MXene/AgNW                                            | 16.9                           | 30000                                 | 42.7           | 16724                                      | 10               |
| 11     | graphene/PDM<br>S foam                                | 1000                           | 2                                     | 30             | 500 dB<br>$\text{cm}^3 \text{g}^{-1}$      | 11               |
| 12     | FM4                                                   | 4                              | 1050000<br>$\pm 135000$               | 25.49          | 13918.31                                   |                  |
| 13     | FM3Ag                                                 | 4                              | 8400000<br>$\pm 250000$               | 45.57          | 24883.45                                   | <b>This work</b> |
| 14     | FM2Ag2                                                | 4                              | 12900000<br>$\pm 280000$              | 51.30          | 28016.19                                   |                  |

---

|    |            |   |                      |       |          |
|----|------------|---|----------------------|-------|----------|
| 15 | FMAg3      | 4 | 18100000<br>± 290000 | 59.70 | 32599.35 |
| 16 | FAg4       | 5 | 27700000<br>± 320000 | 73.55 | 40165.72 |
| 17 | FM2Ag2-Mix | 3 | 398000<br>± 115000   | 24.67 | 13474.13 |

---

96

97

98 **Table S3** Comparison of electrochemical performance of electrodes between this work  
 99 and the published works on MXene hybrids

| Sample | Materials                                                         | Scan rate                  | Specific capacitance<br>(F g <sup>-1</sup> ) | Areal capacitance<br>(mF cm <sup>-2</sup> ) | Stability              | References       |
|--------|-------------------------------------------------------------------|----------------------------|----------------------------------------------|---------------------------------------------|------------------------|------------------|
| 1      | Carbonized<br>MXene/Cotton                                        | 2 mV s <sup>-1</sup>       | 233.6                                        | 794.2                                       | 74% (10000<br>cycles)  | 12               |
| 2      | MXene/ZnO                                                         | 2 mV s <sup>-1</sup>       | 120                                          | 233                                         | 86% (10000<br>cycles)  | 13               |
| 3      | rGO/Ti <sub>3</sub> C <sub>2</sub><br>composite aerogel           | 1 mA cm <sup>-2</sup>      | -                                            | 41                                          | ~100% (1500<br>cycles) | 14               |
| 4      | Polyester@MXene                                                   | 5 mV s <sup>-1</sup>       |                                              | 18.39                                       | 98.2% (6000<br>cycles) | 15               |
| 5      | CNF/CNT/Ti <sub>3</sub> C <sub>2</sub> T <sub>x</sub>             | 0.3 mA<br>cm <sup>-2</sup> | 279.7                                        | 537                                         | 93.1% (8000<br>cycles) | 1                |
| 6      | MXene/CNF                                                         | 2 mV s <sup>-1</sup>       | 285                                          | 25.3                                        | 100% (10000<br>cycles) | 15               |
| 7      | MXene (Ti <sub>3</sub> C <sub>2</sub> T <sub>x</sub> )/<br>CNF/PC | 0.1 mA cm <sup>-2</sup>    | -                                            | 143                                         | 90% (10000<br>cycles)  | 17               |
| 8      | SF-MXene                                                          | 10 mV s <sup>-1</sup>      | 380                                          | -                                           | 94% (10000<br>cycles)  | 18               |
| 9      | Ti <sub>3</sub> C <sub>2</sub> T <sub>x</sub>                     | 5 mV s <sup>-1</sup>       | 273                                          | -                                           | 88.6% (10000)          | 19               |
| 10     | Ti <sub>3</sub> C <sub>2</sub> T <sub>x</sub> /Ag NP              | 2 mV s <sup>-1</sup>       | -                                            | 332.2                                       | 87% (10000)            | 20               |
| 11     | FM2Ag2                                                            | 10 mV s <sup>-1</sup>      | 77.6                                         | 110.7                                       | 92.4% (10000)          |                  |
| 12     | FM2Ag2-Mix                                                        | 10 mV s <sup>-1</sup>      | 73.5                                         | 104.9                                       | 78.6% (10000)          |                  |
| 13     | FMAg3                                                             | 10 mV s <sup>-1</sup>      | 42.6                                         | 60.7                                        | 94.3% (10000)          | <b>This work</b> |
| 14     | FAG4                                                              | 10 mV s <sup>-1</sup>      | 11.9                                         | 16.9                                        | 86.7% (10000)          |                  |



## 101 References

- 102 1 B. Wang, Y. Li, W. Zhang, J. Sun, J. Zhao, Y. Xu, Y. Liu, H. Guo and D. Zhang, *Carbohydr. Polym.*,  
103 2022, **286**, 119302.
- 104 2 H. Zhang and J. Zhang, *J. Appl. Polym. Sci.*, 2020, **137**, 48459.
- 105 3 J. Ma, K. Wang and M. Zhan, *Rsc Adv.*, 2015, **5**, 65283-65296.
- 106 4 W. Cao, C. Ma, S. Tan, M. Ma, P. Wan and F. Chen, *Nano-Micro Lett.*, 2019, **11**, 270-286.
- 107 5 W. Cao, F. Chen, Y. Zhu, Y. Zhang, Y. Jiang, M. Ma and F. Chen, *Acs Nano*, 2018, **12**, 4583-4593.
- 108 6 C. Weng, G. Wang, Z. Dai, Y. Pei, L. Liu and Z. Zhang, *Nanoscale*, 2019, **11**, 22804-22812.
- 109 7 Y. Cheng, Y. Lu, M. Xia, L. Piao, Q. Liu, M. Li, Y. Zhou, K. Jia, L. Yang and D. Wang, *Compos.*  
110 *Sci. Technol.*, 2021, **215**, 109023.
- 111 8 H. Cheng, Y. Pan, Q. Chen, R. Che, G. Zheng, C. Liu, C. Shen and X. Liu, *Adv. Compos. Hybrid*  
112 *Mater.*, 2021, **4**, 505-513.
- 113 9 B. Zhou, Q. Li, P. Xu, Y. Feng, J. Ma, C. Liu and C. Shen, *Nanoscale*, 2021, **13**, 2378-2388.
- 114 10 M. Miao, R. Liu, S. Thaiboonrod, L. Shi, S. Cao, J. Zhang, J. Fang and X. Feng, *J. Mater. Chem. C*,  
115 2020, **8**, 3120-3126.
- 116 11 Z. Chen, C. Xu, C. Ma, W. Ren and H. Cheng, *Adv. Mater.*, 2013, **25**, 1296-1300.
- 117 12 Y. Li, Z. Lu, B. Xin, Y. Liu, Y. Cui and Y. Hu, *Appl. Surf. Sci.*, 2020, **528**, 146975.
- 118 13 F. Wang, M. Cao, Y. Qin, J. Zhu, L. Wang and Y. Tang, *Rsc Adv.*, 2016, **6**, 88934-88942.
- 119 14 R. N. K. A, M. H. M, N. M. R, D. Mondal, S. K. Nataraj and D. Ghosh, *Appl. Surf. Sci.*, 2019, **481**,  
120 892-899.
- 121 15 W. Shao, M. Tebyetekerwa, I. Marriam, W. Li, Y. Wu, S. Peng, S. Ramakrishna, S. Yang and M.  
122 Zhu, *J. Power Sources*, 2018, **396**, 683-690.
- 123 16 W. Tian, A. VahidMohammadi, M. S. Reid, Z. Wang, L. Ouyang, J. Erlandsson, T. Pettersson, L.  
124 Wågberg, M. Beidaghi and M. M. Hamedi, *Adv. Mater.*, 2019, **31**, 1902977.
- 125 17 W. Chen, D. Zhang, K. Yang, M. Luo, P. Yang and X. Zhou, *Chem. Eng. J.*, 2021, **413**, 127524.
- 126 18 L. Yin, H. Kang, H. Ma, J. Wang, Y. Liu, Z. Xie, Y. Wang and Z. Fan, *Carbon (New York)*, 2021,  
127 **182**, 124-133.
- 128 19 J. Wu, Q. Li, C. E. Shuck, K. Maleski, H. N. Alshareef, J. Zhou, Y. Gogotsi and L. Huang, *Nano Res.*,  
129 2022, **15**, 535-541.
- 130 20 L. Li, N. Zhang, M. Zhang, L. Wu, X. Zhang and Z. Zhang, *Acs Sustain. Chem. Eng.*, 2018, **6**, 7442-  
131 7450.
- 132
